# Supplementary material for: Impact of COVID-19 Outbreak on the Gynecological Outpatients HPV Infection Rate in Wuhan, China: A Retrospective Observational Study
Source: PubMed Central journal article supplement (PMC9035827; doi:10.3389/fmed.2022.799736), 2022-04-11
Supplement: Data_Sheet_1.pdf [file Data_Sheet_1.pdf]

Table S1 HPV infection rates in overall cohort in different stage population

|                                   | Stage I<br>N=4150    | Stage II<br>N=4967   | Stage III<br>N=2405 | Stage IV<br>N=4725  | P value          |
|-----------------------------------|----------------------|----------------------|---------------------|---------------------|------------------|
| Age(Medium, IQR)                  | 41 (32-49)           | 41 (32-49)           | 41 (32-50)          | 41 (33-50)          | 0.074            |
| Age 16-35                         | 1443 (34.8)          | 1730 (34.8)          | 837 (34.8)          | 1592 (33.7)         | 0.158            |
| Age 36-44                         | 1074 (25.5)          | 1315 (26.5)          | 567 (23.6)          | 1217 (25.8)         |                  |
| Age 45-55                         | 1121 (27.0)          | 1271 (27.2)          | 653 (27.2)          | 1272 (26.9)         |                  |
| Age >55                           | 529 (12.7)           | 651 (13.1)           | 348 (14.5)          | 644 (13.6)          |                  |
| Visit per month<br>( Medium, IQR) | 739.0 (578.0-812.0)b | 812.5 (772.8-885.3)d | 371.0 (0.0-641.0)f  | 798.5 (775.0-819.0) | <b>&lt;0.001</b> |
| HPV                               | 820 (19.8) abc       | 1155 (23.3) d        | 369(15.3) f         | 1003 (21.2)         | <b>&lt;0.001</b> |
| HR-HPV                            | 669 (16.1) abc       | 932 (18.8) d         | 294 (12.2) f        | 801 (17.0)          | <b>&lt;0.001</b> |
| LR-HPV                            | 255 (6.1)b           | 370 (7.4) d          | 103 (4.3) f         | 331 (7.0)           | <b>&lt;0.001</b> |
| M-HPV                             | 185 (4.5) b          | 277 (5.6) d          | 66 (2.7) f          | 246 (5.2)           | <b>&lt;0.001</b> |
| S-HPV                             | 635 (15.3) ab        | 878 (17.7) d         | 303 (12.6) f        | 757 (16.0)          | <b>&lt;0.001</b> |
| TCT                               | 312 (7.5) a          | 498 (10.0) de        | 165 (6.9)           | 331 (7.0)           | <b>&lt;0.001</b> |
| TCT And HPV                       | 180 (4.3) a          | 295 (5.9) de         | 84 (3.5)            | 193 (4.1)           | <b>&lt;0.001</b> |
| TCT And HR-HPV                    | 139 (3.3) a          | 247 (5.0) de         | 64 (2.7)            | 166 (3.5)           | <b>&lt;0.001</b> |

Note: HPV: human papillomavirus, HR-HPV: high-risk HPV infection, LR-HPV: Low-risk HPV infection, M-HPV: multiple genotype HPV infection, S-HPV: single genotype HPV infection, TCT: Thin-Prep cytology test abnormal. TCT And HPV: Concurrent of abnormal TCT and HPV infection. a, Stage I Vs. Stage II; b, Stage I Vs. Stage III; c, Stage I Vs. Stage IV; d, Stage II Vs. Stage III; e, Stage II Vs. Stage IV; f, Stage III Vs. Stage IV.

Table S2 HPV infections rates in TCT normal population in different stage.

|                  | Stage I<br>N=3838 | Stage II<br>N=4469 | Stage III<br>N=2240 | Stage IV<br>N=4394 | P value |
|------------------|-------------------|--------------------|---------------------|--------------------|---------|
| Age(Medium, IQR) | 41 (32-49)        | 41 (32-49)         | 41 (32-50)          | 41 (33-49)         | 0.193   |
| Age 16-35        | 1354 (35.3)       | 1576 (35.3)        | 795 (35.5)          | 1513 (34.4)        | 0.507   |
| Age 36-44        | 977 (25.5)        | 1180 (26.4)        | 532 (23.8)          | 1130 (25.7)        |         |
| Age 45-55        | 1024 (26.7)       | 1148 (25.7)        | 605 (27.0)          | 1174 (26.7)        |         |
| Age >55          | 483 (12.6)        | 565 (12.6)         | 308 (13.8)          | 577 (13.1)         |         |
| HPV              | 640 (16.4) ab     | 860 (19.2) d       | 285 (12.7) f        | 810 (18.4)         | <0.001  |
| HR-HPV           | 530 (13.8)b       | 685 (15.3)d        | 230 (10.3)f         | 635 (14.5)         | <0.001  |
| LR-HPV           | 197 (5.1)b        | 281 (6.3)d         | 79 (3.5)f           | 274 (5.6)          | <0.001  |
| M-HPV            | 135 (3.5)b        | 193 (4.3)d         | 48 (2.1)f           | 189 (4.3)          | <0.001  |
| S-HPV            | 505 (13.2)b       | 667 (14.9)d        | 237 (10.6)f         | 621 (14.1)         | <0.001  |

Note: HPV: human papillomavirus, HR-HPV: high-risk HPV infection, LR-HPV: Low-risk HPV infection, M-HPV: multiple genotype HPV infection, S-HPV: single genotype HPV infection, TCT: Thin-Prep cytology test abnormal. a, Stage I Vs. Stage II; b, Stage I Vs. Stage III; c, Stage I Vs. Stage IV; d, Stage II Vs. Stage III; e, Stage II Vs. Stage IV; f, Stage III Vs. Stage IV.

Table S3 HPV infections rates in TCT abnormal population in different stage.

|                  | Stage I<br>N=312 | Stage II<br>N=498 | Stage III<br>N=165 | Stage IV<br>N=331 | P value |
|------------------|------------------|-------------------|--------------------|-------------------|---------|
| Age(Medium, IQR) | 43 (34-50)       | 42 (33-51)        | 46 (35-54)         | 44 (36-53)        | 0.196   |
| Age 16-35        | 89 (28.5)        | 154 (30.9)        | 42 (25.5)          | 79 (23.9)         | 0.082   |
| Age 36-44        | 80 (25.6)        | 135 (27.1)        | 35 (21.2)          | 87 (26.3)         |         |
| Age 45-55        | 97 (31.1)        | 123 (24.7)        | 48 (29.1)          | 98 (29.6)         |         |
| Age >55          | 46 (14.7)        | 86 (17.3)         | 40 (24.2)          | 67 (20.2)         |         |
| HPV              | 180 (57.7)       | 295 (59.2)        | 84 (50.9)          | 193 (58.3)        | 0.303   |
| HR-HPV           | 139 (44.6)       | 247 (49.6)        | 68 (41.2)          | 166 (50.2)        | 0.138   |
| LR-HPV           | 58 (18.6)        | 89 (17.9)         | 24 (14.5)          | 57 (17.2)         | 0.724   |
| M-HPV            | 50 (16.0)        | 84 (16.9)         | 18 (10.9)          | 57 (17.2)         | 0.281   |
| S-HPV            | 130 (41.7)       | 211 (42.4)        | 66 (40.0)          | 136 (41.1)        | 0.954   |
| ASCUS            | 213 (68.3)       | 300 (60.2)        | 96 (58.2)          | 222 (67.1)        | 0.054   |
| LSIL             | 74 (23.7)        | 139 (27.9)        | 55 (33.3)          | 83 (25.1)         |         |
| HSIL             | 25 (8.0)         | 59 (11.8)         | 14 (8.5)           | 26 (7.9)          |         |

Note: HPV: human papillomavirus, HR-HPV: high-risk HPV infection, LR-HPV: Low-risk HPV infection, M-HPV: multiple genotype HPV infection, S-HPV: single genotype HPV infection, TCT: Thin-Prep cytology test abnormal.

Table S4 Prevalence of HPV genotype in HPV abnormal population in different stage.

| HPV Genotype | Overall Cohort          |                         |                        |                    |                  | TCT positive           |                   |                    |                   |         |
|--------------|-------------------------|-------------------------|------------------------|--------------------|------------------|------------------------|-------------------|--------------------|-------------------|---------|
|              | Stage I<br>N=4151       | Stage II<br>N=4967      | Stage III<br>N=2405    | Stage IV<br>N=4725 | P value          | Stage I<br>N=312       | Stage II<br>N=498 | Stage III<br>N=165 | Stage IV<br>N=331 | P value |
| HR-HPV       |                         |                         |                        |                    |                  |                        |                   |                    |                   |         |
| HPV16        | 116 (2.79)              | 116 (2.34)              | 58 (2.41)              | 120 (2.54)         | 0.555            | 33 (10.9) <sup>a</sup> | 37 (7.4)          | 18 (10.9)          | 34 (10.3)         | 0.317   |
| HPV18        | 41 (0.99)               | 58 (1.17)               | 14 (0.58)              | 38 (0.80)          | 0.067            | 14 (4.5)               | 15 (3.0)          | 3 (1.8)            | 9 (2.7)           | 0.387   |
| HPV26        | 1 (0.02)                | 0 (0.00)                | 0 (0.00)               | 1 (0.02)           | 0.642            | 0 (0.0)                | 0 (0.0)           | 0 (0.0)            | 0 (0.0)           | NA      |
| HPV31        | 11 (0.27)               | 26 (0.52)               | 7 (0.29)               | 21 (0.44)          | 0.191            | 2 (0.6)                | 5 (1.0)           | 3 (1.8)            | 3 (0.9)           | 0.669   |
| HPV33        | 23 (0.55)               | 32 (0.64)               | 13 (0.54)              | 30 (0.63)          | 0.909            | 4 (1.3)                | 9 (1.8)           | 3 (1.8)            | 5 (1.5)           | 0.940   |
| HPV35        | 12 (0.29)               | 16 (0.32)               | 4 (0.17)               | 14 (0.30)          | 0.691            | 5 (1.6)                | 7 (1.4)           | 1 (0.6)            | 3 (0.9)           | 0.729   |
| HPV39        | 25 (0.60) <sup>a</sup>  | 72 (1.45)               | 19 (0.80)              | 43 (0.91)          | <b>&lt;0.001</b> | 2 (0.6)                | 12 (2.4)          | 7 (4.2)            | 6 (1.8)           | 0.061   |
| HPV45        | 6 (0.14)                | 10 (0.20)               | 3 (0.12)               | 6 (0.13)           | 0.775            | 0 (0.0)                | 2 (0.4)           | 1 (0.6)            | 1 (0.3)           | 0.661   |
| HPV51        | 39 (0.94)               | 58 (1.67)               | 13 (0.54)              | 47 (0.99)          | 0.140            | 9 (2.9)                | 22 (4.4)          | 4 (2.4)            | 8 (2.4)           | 0.343   |
| HPV52        | 139 (3.35) <sup>a</sup> | 236 (4.75) <sup>d</sup> | 56 (2.33) <sup>f</sup> | 195 (4.13)         | <b>&lt;0.001</b> | 33 (10.6)              | 56 (11.2)         | 8 (4.8)            | 39 (11.8)         | 0.089   |
| HPV53        | 90 (2.17)               | 124 (2.50)              | 45 (1.87)              | 116 (2.46)         | 0.304            | 19 (6.1)               | 33 (6.6)          | 11 (6.7)           | 23 (6.9)          | 0.978   |
| HPV56        | 50 (1.20)               | 62 (1.25)               | 25 (1.04)              | 65 (1.38)          | 0.673            | 12 (3.8)               | 23 (4.6)          | 8 (4.8)            | 20 (6.0)          | 0.622   |
| HPV58        | 118 (2.84)              | 153 (3.08) <sup>d</sup> | 46 (1.91)              | 125 (2.65)         | <b>0.034</b>     | 30 (9.6)               | 50 (10.0)         | 12 (7.3)           | 30 (9.1)          | 0.758   |
| HPV59        | 43 (1.04)               | 52 (1.05)               | 23 (0.96)              | 50 (1.06)          | 0.981            | 10 (3.2)               | 15 (3.0)          | 5 (3.0)            | 11 (3.3)          | 0.995   |
| HPV66        | 59 (1.42) <sup>bc</sup> | 44 (0.86)               | 15 (0.62)              | 37 (0.78)          | <b>0.004</b>     | 12 (3.8)               | 13 (2.6)          | 5 (3.0)            | 9 (2.7)           | 0.772   |
| HPV68        | 21 (0.51)               | 34 (0.68)               | 12 (0.50)              | 25 (0.53)          | 0.613            | 7 (2.2)                | 10 (2.0)          | 2 (1.2)            | 3 (0.9)           | 0.506   |
| HPV82        | 9 (0.22)                | 23 (0.46)               | 3 (0.12)               | 15 (0.32)          | 0.054            | 0 (0.0)                | 4 (0.8)           | 0 (0.0)            | 1 (0.3)           | 0.241   |
| LR-HPV       |                         |                         |                        |                    |                  |                        |                   |                    |                   |         |
| HPV6         | 30 (0.72)               | 40 (0.81)               | 12 (0.50)              | 43 (0.91)          | 0.292            | 6 (1.9)                | 14 (2.8)          | 7 (4.2)            | 8 (2.4)           | 0.503   |
| HPV11        | 21 (0.51)               | 21 (0.42)               | 3 (0.12)               | 14 (0.30)          | 0.066            | 3 (1.0)                | 8 (1.6)           | 1 (0.6)            | 3 (0.9)           | 0.655   |
| HPV40        | 5 (0.12)                | 3 (0.06)                | 0 (0.00)               | 1 (0.02)           | 0.137            | 0 (0.0)                | 0 (0.0)           | 0 (0.0)            | 0 (0.0)           | NA      |
| HPV42        | 15 (0.36)               | 23 (0.46)               | 3 (0.12)               | 16 (0.34)          | 0.149            | 2 (0.6)                | 9 (1.8)           | 2 (1.2)            | 6 (1.8)           | 0.525   |
| HPV43        | 43 (1.00)               | 39 (0.79)               | 18 (0.79)              | 47 (0.99)          | 0.445            | 8 (2.6)                | 12(2.4)           | 3 (1.8)            | 7 (2.1)           | 0.951   |
| HPV44        | 15 (0.36) <sup>ac</sup> | 50 (1.00) <sup>d</sup>  | 8 (0.33) <sup>f</sup>  | 50 (1.06)          | <b>&lt;0.001</b> | 7 (2.2)                | 8 (1.6)           | 0 (0.0)            | 6 (1.8)           | 0.310   |
| HPV55        | 21 (0.51)               | 36 (0.72)               | 12 (0.50)              | 37 (0.78)          | 0.273            | 6 (1.9)                | 5 (1.0)           | 4 (2.4)            | 6 (1.8)           | 0.574   |
| HPV61        | 57 (1.37)               | 96 (1.93)               | 33 (1.37)              | 88 (1.86)          | 0.086            | 13 (4.2)               | 20 (4.0)          | 7 (4.2)            | 21 (6.3)          | 0.422   |
| HPV81        | 61 (1.47)               | 89 (1.79)               | 19 (0.79) <sup>f</sup> | 76 (1.61)          | <b>0.010</b>     | 13 (4.2)               | 20 (4.0)          | 2 (1.2)            | 12 (3.6)          | 0.355   |
| HPV83        | 5 (0.12)                | 7 (0.14)                | 2 (0.08)               | 10 (0.21)          | 0.529            | 2 (0.6)                | 3 (0.6)           | 0 (0.0)            | 3 (0.9)           | 0.684   |

Note: HPV: human papillomavirus, HR-HPV: high-risk HPV infection, LR-HPV: Low-risk HPV infection. a, Stage I Vs. Stage II; b, Stage I Vs. Stage III; c, Stage I Vs. Stage IV; d, Stage II Vs. Stage III; e, Stage II Vs. Stage IV; f, Stage III Vs. Stage IV.
